# Supplementary material
Source: PubMed Central journal article supplement (PMC1475492)
Supplement: plntcell_tpc.105.039008_1.pdf [file plntcell_tpc.105.039008_1.pdf]

# A

*AGD1*  
At5g61980

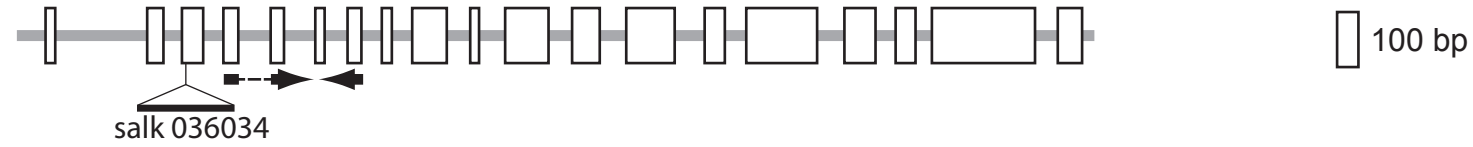

*AGD2*  
At1g60860

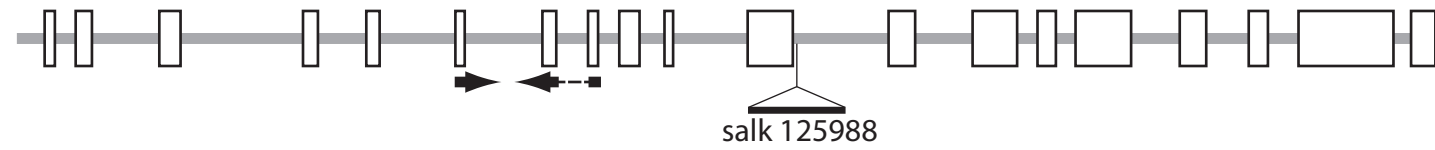

*AGD4*  
At1g10870

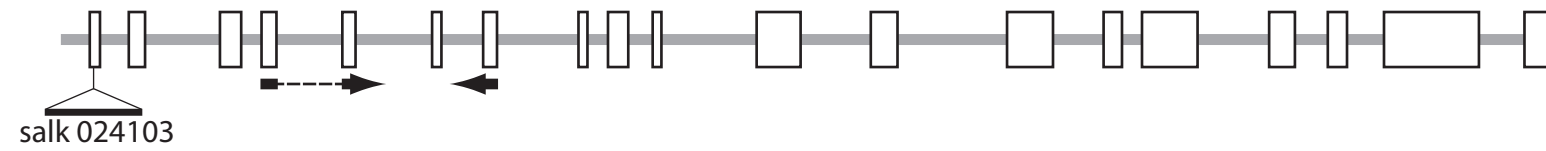

# B

*agd1*: Salk\_036034, insertion 76 nt into exon 3

*agd2*: Salk\_125988, insertion 7 nt into intron 11

*agd4*: Salk\_024103, insertion within 5' UTR, 68 nt upstream of the ATG
