# Supplementary material
Source: PubMed Central journal article supplement (PMC1475492)

Col-0

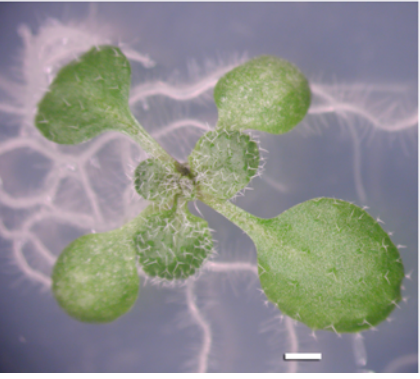

*sfc-9*

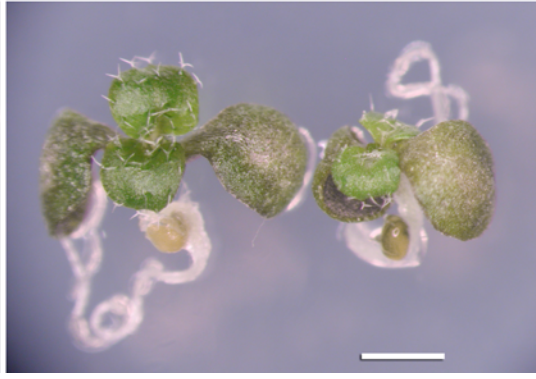

*sfc-9 agd1*  
*agd2 agd4*

Supplement: plntcell_tpc.105.039008_2.pdf [file plntcell_tpc.105.039008_2.pdf]

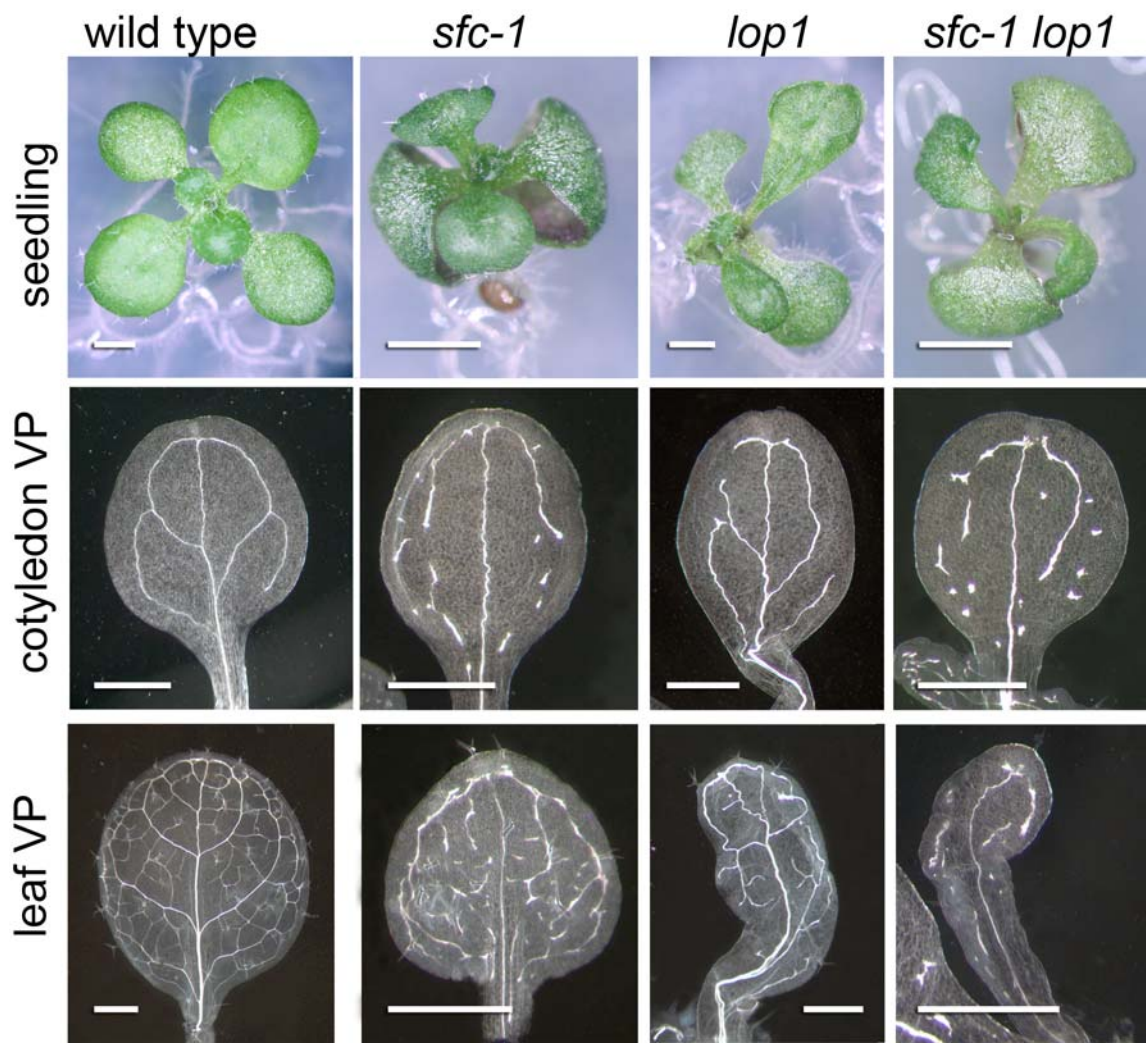

Supplement: plntcell_tpc.105.039008_3.pdf [file plntcell_tpc.105.039008_3.pdf]

----- WILD TYPE -----

PIN1:GFP

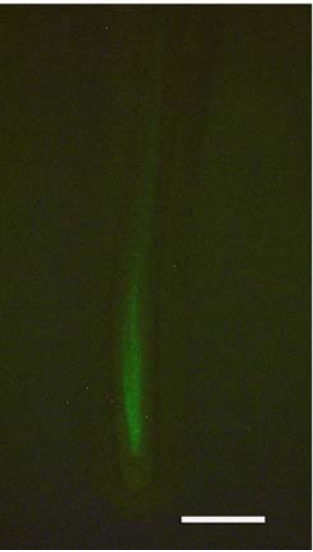

DIC

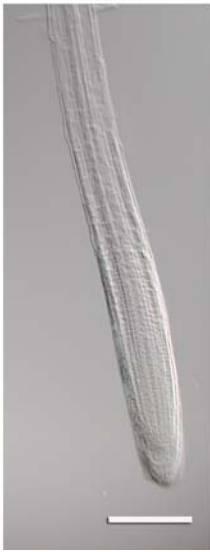

----- SCARFACE-1 -----

PIN1:GFP

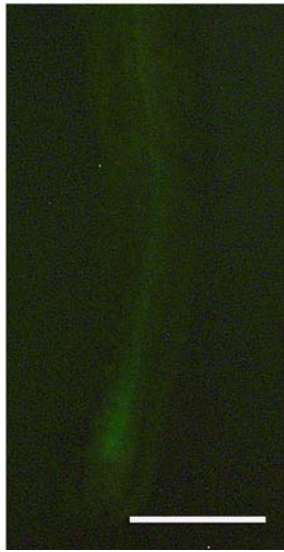

DIC

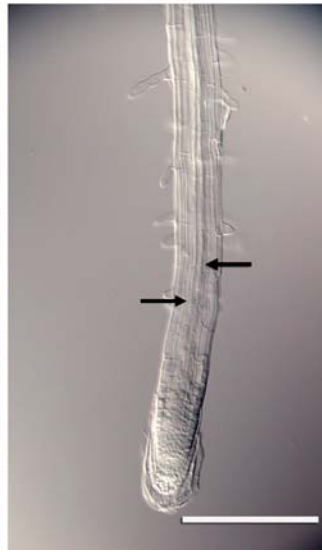

Supplement: plntcell_tpc.105.039008_4.pdf [file plntcell_tpc.105.039008_4.pdf]
